# Supplementary material for: Unconventional formation of dual-colored InP quantum dot-embedded silica composites for an operation-stable white light-emitting diode
Source: Royal Society of Chemistry journal article supplement (doi:10.1039/c8tc04095h), 2018-01-01
Supplement: c8tc04095h1.pdf [file c8tc04095h1.pdf]

## **Electronic Supplementary Information (ESI)**

# **Unconventional formation of dual-colored InP quantum dots-embedded silica composites for operation-stable white light-emitting diode**

Eun-Pyo Jang, Jung-Ho Jo, Seung-Won Lim, Han-Byule Lim, Hwi-Jae Kim, Chang-Yeol Han  
and Heesun Yang\*

Department of Materials Science and Engineering, Hongik University, Seoul 04066, Republic of  
Korea

\*Email - [hyang@hongik.ac.kr](mailto:hyang@hongik.ac.kr)

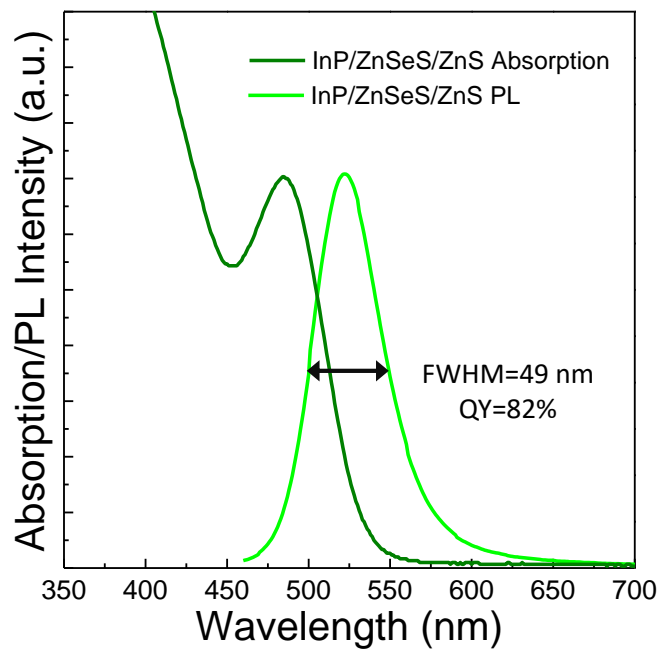

**Fig. S1.** Absorption and PL spectra of green InP/ZnSeS/ZnS QDs.

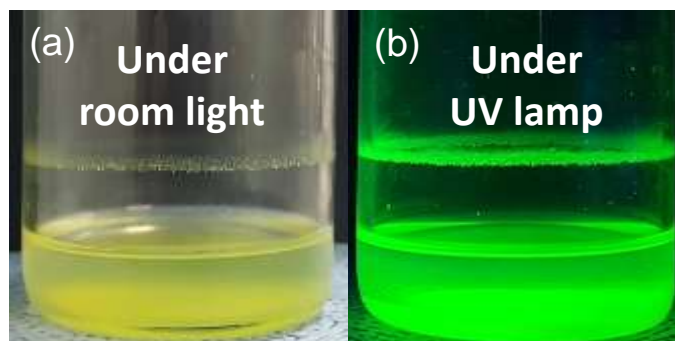

**Fig. S2.** Photographs of as-prepared green QDs-silica solution reacted for 20 h under (a) room light and (b) UV lamp.

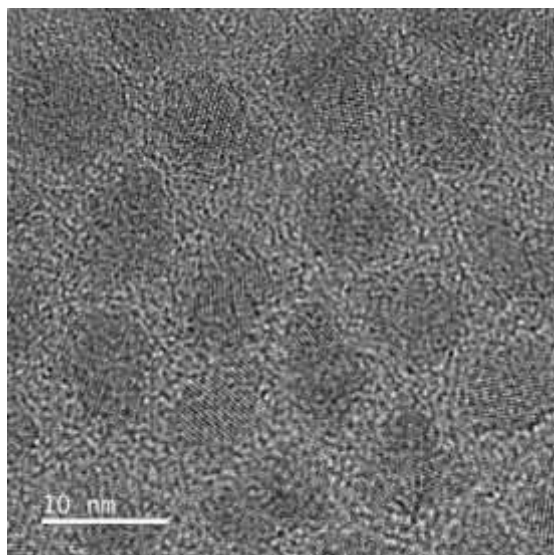

**Fig. S3.** High-magnification TEM image of green InP/ZnSeS/ZnS QDs (scale bar: 10 nm).

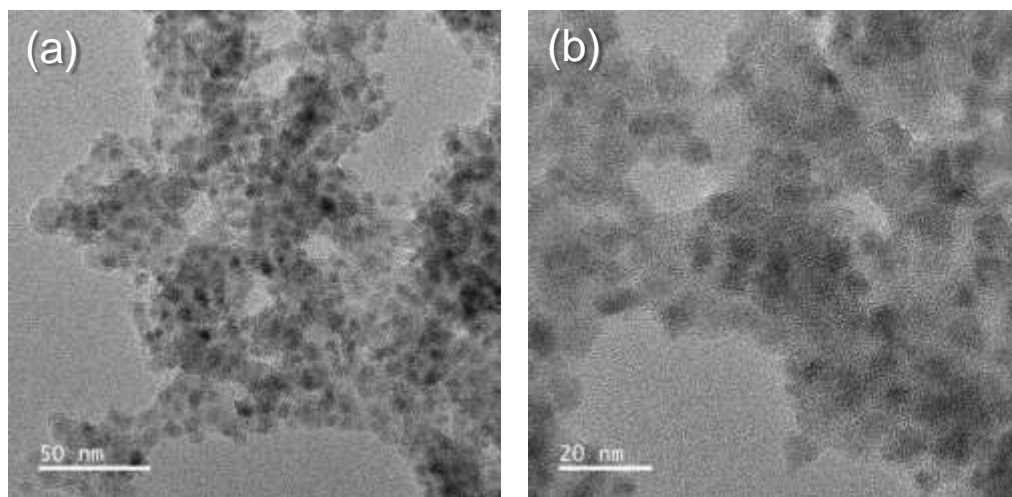

**Fig. S4.** (a) Low- and (b) higher-magnification TEM images additionally taken from the different areas of the same green InP QDs-silica composites as in Fig. 4(b).

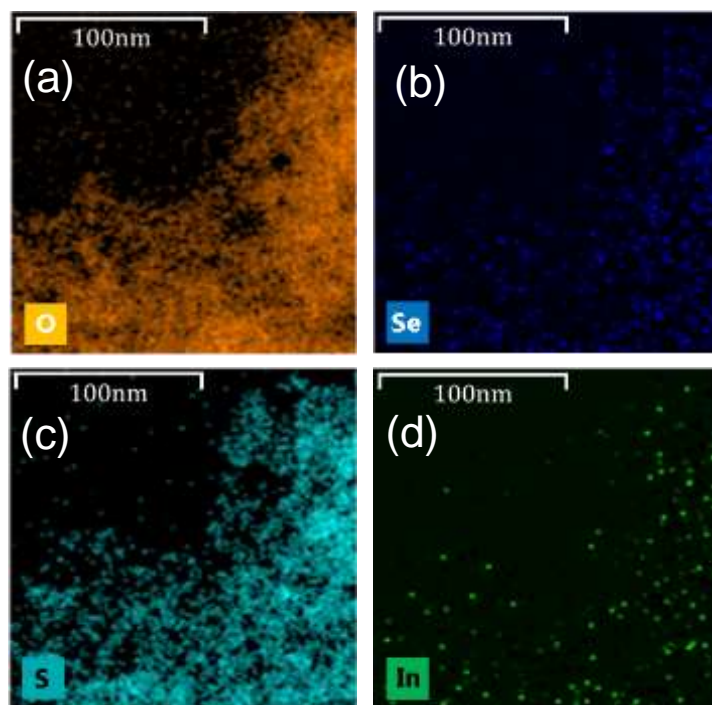

**Fig. S5.** (a) O-, (b) Se-, (c) S-, and (d) In-related x-ray signal-based EDS compositional mapping images corresponding to the dotted region of Fig. 4(b).

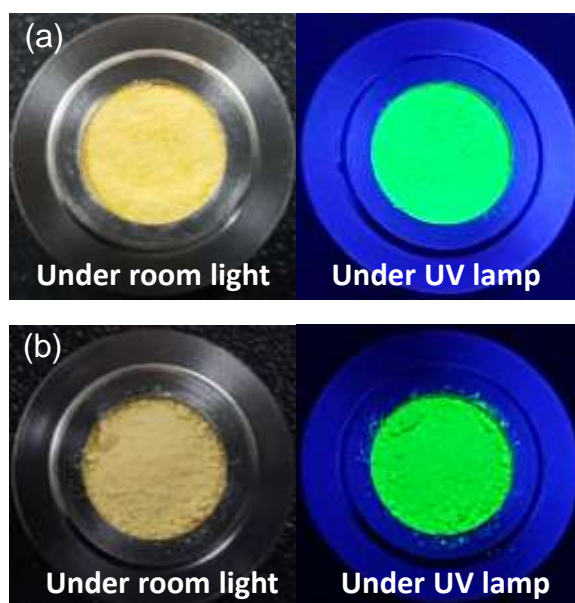

**Fig. S6.** Photographs of green (a) pristine QDs and (b) QDs-silica composites in a powder form under room light and UV lamp.

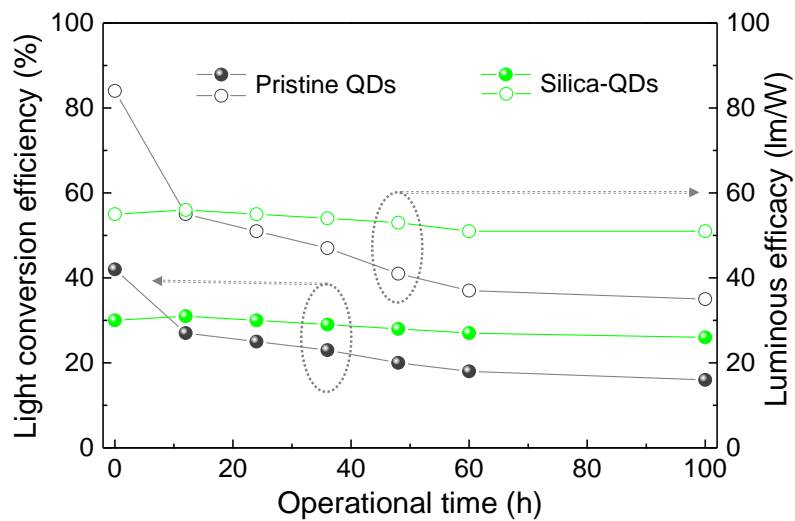

**Fig. S7.** Operation time-dependent variations of light conversion efficiency and luminous efficacy of QD-LEDs packaged with green pristine QDs and QDs-silica composites at a driving current of 60 mA.

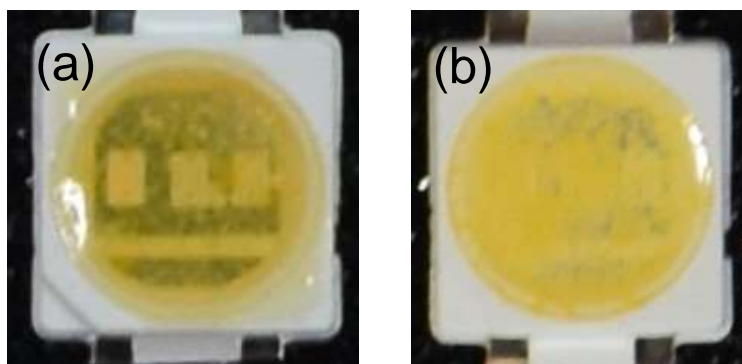

**Fig. S8.** Photographs of green (a) pristine QDs- and (b) QDs-silica composites-packaged QD-LEDs, showing a more turbidity from the latter compared to the former device.

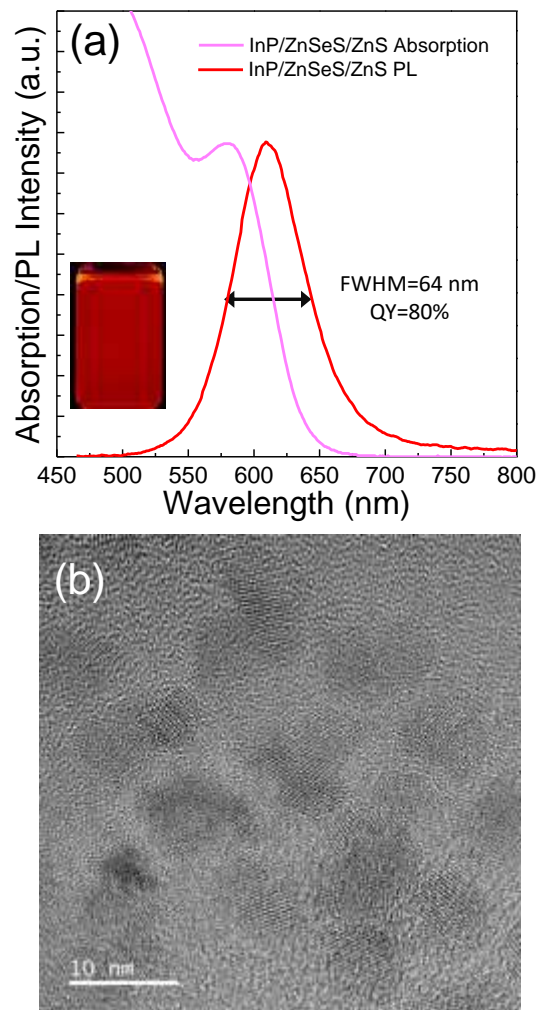

**Fig. S9.** (a) Absorption and PL spectra and (b) high-magnification TEM image of red InP/ZnSeS/ZnS QDs (scale bar: 10 nm).

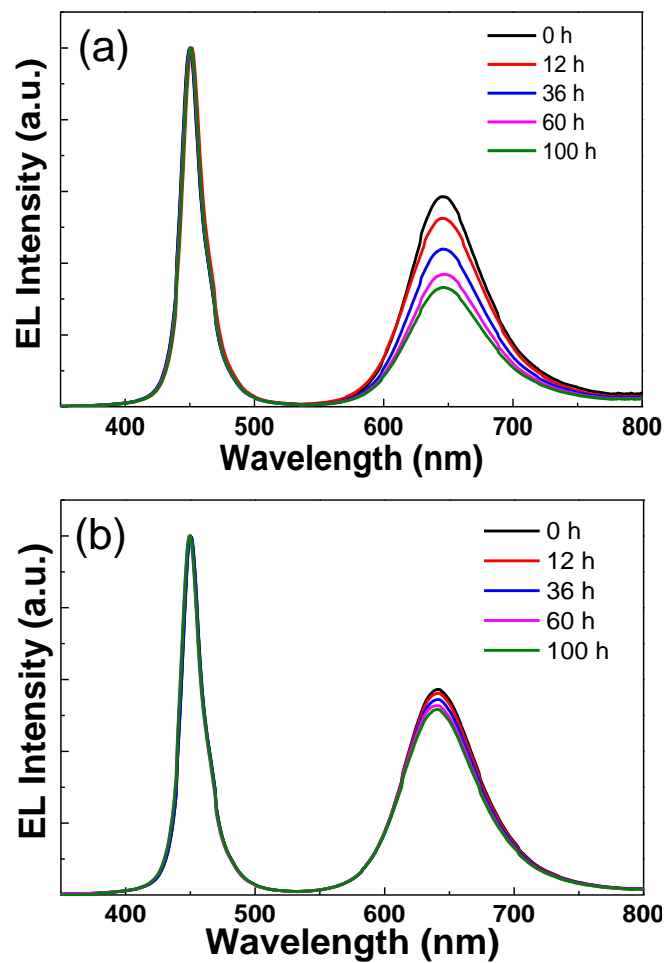

**Fig. S10.** As-collected EL spectral variations of QD-LEDs with (a) pristine red QDs and (b) red QDs-silica composites with operational time up to 100 h at 60 mA.

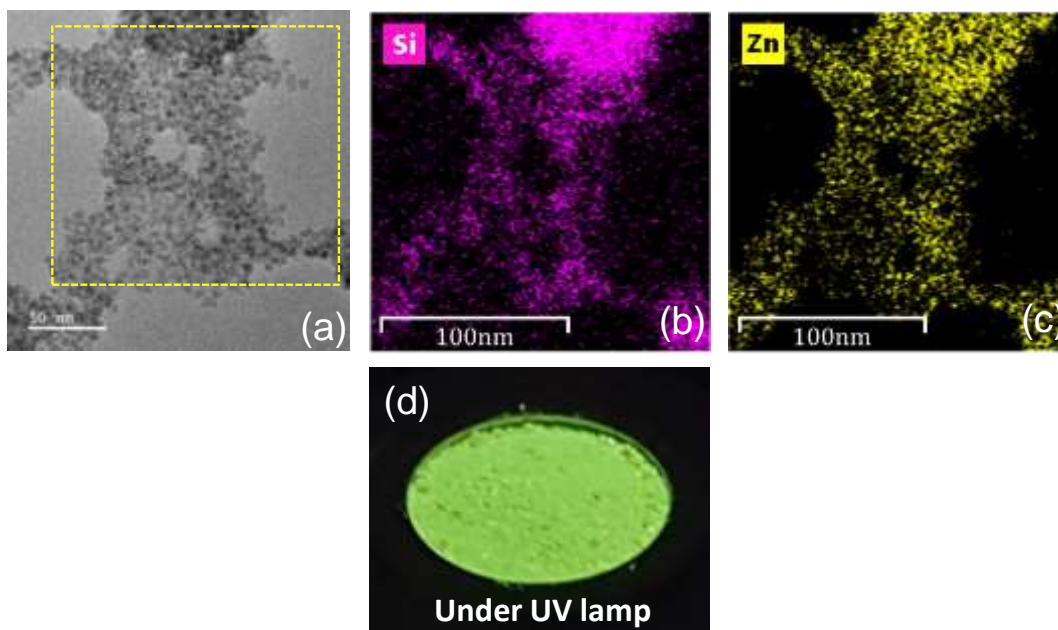

**Fig. S11.** (a) TEM image of silica composites coembedded with green and red QDs. (b) Si- and (c) Zn-x-ray signal-based EDS compositional mapping images corresponding to the dotted region of (a). (d) Photograph of green/red QDs-silica composites in a powder form under UV lamp.



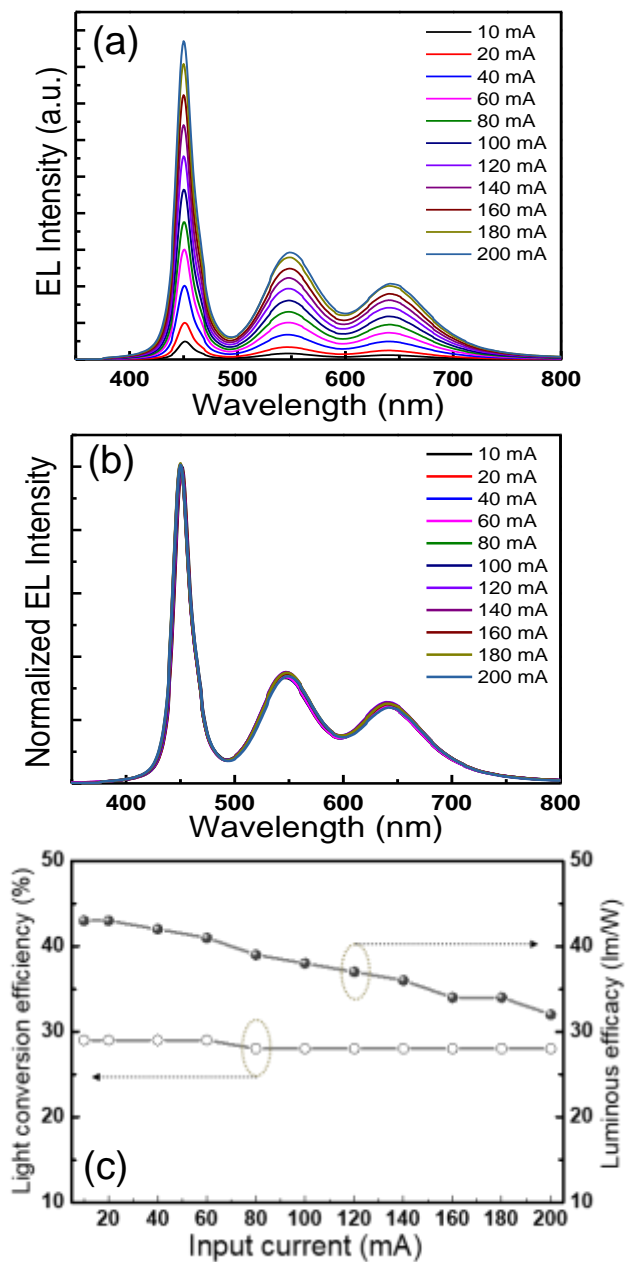

**Fig. S12.** (a) As-collected and (b) normalized EL spectra and (c) variations in light conversion efficiency and luminous efficacy of tricolored white QD-LED as a function of input current.
